# Supplementary material
Source: PubMed Central journal article supplement (PMC1937515)

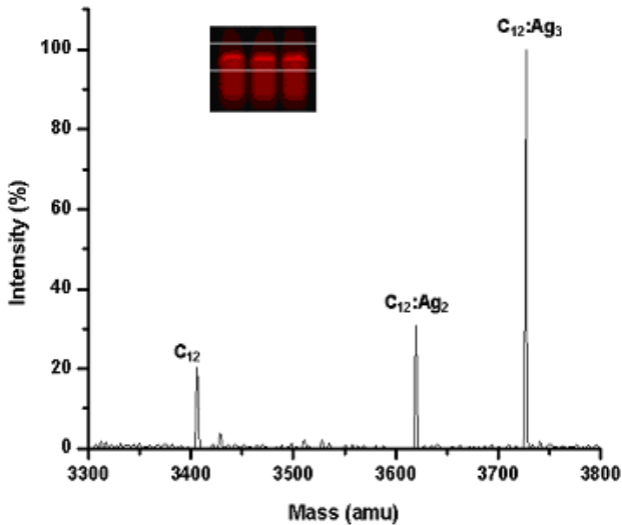

Supplement: pnas_0610677104_1.pdf [file pnas_0610677104_1.pdf]
